# Supplementary material for: Chitosan as an Alternative to Oil-Based Materials for the Fabrication of Lab-on-a-Chip
Source: Micromachines (Basel). 2024 Mar 12;15(3):379. doi: 10.3390/mi15030379 (PMC10971945; doi:10.3390/mi15030379)
Supplement: Supplementary file 1 [file micromachines-15-00379-s001.zip › micromachines-2891335-supplementary.pdf]

## **Supplementary Materials for**

# **Chitosan as an alternative to oil-based materials for the fabrication of lab-on-a-chip**

**Morgane Zimmer <sup>1,\*</sup>, Stéphane Trombotto <sup>2</sup>, Emmanuelle Laurenceau <sup>1</sup> and Anne-Laure Deman <sup>1</sup>**

<sup>1</sup> Ecole Centrale de Lyon, INSA Lyon, CNRS, Université Claude Bernard Lyon 1, CPE Lyon, INL, UMR5270, 69130 Ecully, France; emmanuelle.laurenceau@ec-lyon.fr (E.L.); anne-laure.deman-him@univ-lyon1.fr (A.-L.D.)

<sup>2</sup> Ingénierie des Matériaux Polymères (UMR5223), Université Claude Bernard Lyon 1, CNRS, INSA Lyon, Université Jean Monnet, 69622 Villeurbanne, France; stephane.trombotto@univ-lyon1.fr

\* Correspondence: morgane.zimmer@ec-lyon.fr

## **Characterization Methods of Starting Chitosan (244LG, Batch Number 20140503, Mahtani Chitosan Pvt. Ltd., Veraval, India)**

### **1. Proton Nuclear Magnetic Resonance Spectroscopy ( $^1\text{H}$ NMR)**

The DA of starting chitosan was determined by  $^1\text{H}$  NMR according to the method described by Hirai et al. [75]. The  $^1\text{H}$  NMR spectrum was recorded on an AV300 Bruker (300 MHz) spectrometer (Bruker, Billerica, MA, USA) at ambient temperature. Chitosan powder was dissolved at 10 mg/mL in  $\text{D}_2\text{O}$  with 5  $\mu\text{L}$  HCl (12 N) and transferred to 5 mm NMR tubes. Trimethylsilyl-3-propionic-2,2,3,3-D<sub>4</sub> acid sodium salt (TMPSA, Sigma-Aldrich, Saint-Quentin Fallavier, France) was used as an internal reference. The Bruker Topspin software (Bruker, Billerica, MA, USA, version 3.6) was used for the analysis of the spectrum.

### **2. Size-Exclusion Chromatography (SEC)**

The average molar masses ( $M_w$  and  $M_n$ ) and the dispersity  $\bar{D}$  of starting chitosan were determined by size exclusion chromatography (SEC). Chitosan powder was first dissolved in a 0.2 M acetic acid/0.15 M ammonium acetate buffer (pH 4.5) at a concentration from 1.0 mg/mL for a minimum of 18 h at ambient temperature. The solution was then filtered using 0.45  $\mu\text{m}$  pore size CME membranes (Millipore, Burlington, MA, USA). The macromolecule separation was performed on two serially connected columns (TSK G2500PW and TSK G6000PW, Tosoh Bioscience, Tokyo, Japan). A differential refractometer (Optilab T-rex, Wyatt Technology, Santa Barbara, USA) coupled online with a MALLS detector (Dawn Heleos II, Wyatt Technology, Santa Barbara, USA) was used for the detection. A degassed 0.2 M acetic acid/0.15 M ammonium acetate buffer (pH 4.5) was used as an eluent after filtration on a 0.10  $\mu\text{m}$  pore size membrane (Millipore, Burlington, MA, USA). The flow rate was maintained at 0.5 mL/min, and the amount of sample injected was 100  $\mu\text{L}$ . The refractive index increment ( $dn/dc$ ) was adjusted to 0.198 for a degree of acetylation of 0.8% according to the results of Schatz et al. [76]. The ASTRA software (Wyatt Technology, Santa Barbara, USA, version 6.1) was used for the analysis of chromatogram.

### **3. Thermogravimetric Analysis (TGA)**

Water and ash contents of starting chitosan were determined by TGA using an SDT-Q600 analyzer (TA Instruments, New Castle, DE, USA). Thermogravimetric analysis was performed with 15-20 mg of sample under a flow of air (100 mL/min), and by using a temperature ramp of 2  $^{\circ}\text{C}/\text{min}$  from ambient temperature to 200  $^{\circ}\text{C}$ , then a temperature ramp of 20  $^{\circ}\text{C}/\text{min}$  up to 900  $^{\circ}\text{C}$  and finally an isotherm of

30 min at 900 °C. The TA Universal Analysis 2000 software (TA Instruments, New Castle, DE, USA, version 4). was used for the analysis of thermogram.

## References

75. Hirai, A.; Odani, H.; Nakajima, A. Determination of Degree of Deacetylation of Chitosan by <sup>1</sup>H NMR Spectroscopy. *Polym. Bull.* 1991, 26, 87–94. <https://doi.org/10.1007/BF00299352>
76. Schatz, C.; Viton, C.; Delair, T.; Pichot, C.; Domard, A. Typical Physicochemical Behaviors of Chitosan in Aqueous Solution. *Biomacromolecules* 2003, 4 (3), 641–648. <https://doi.org/10.1021/bm025724c>

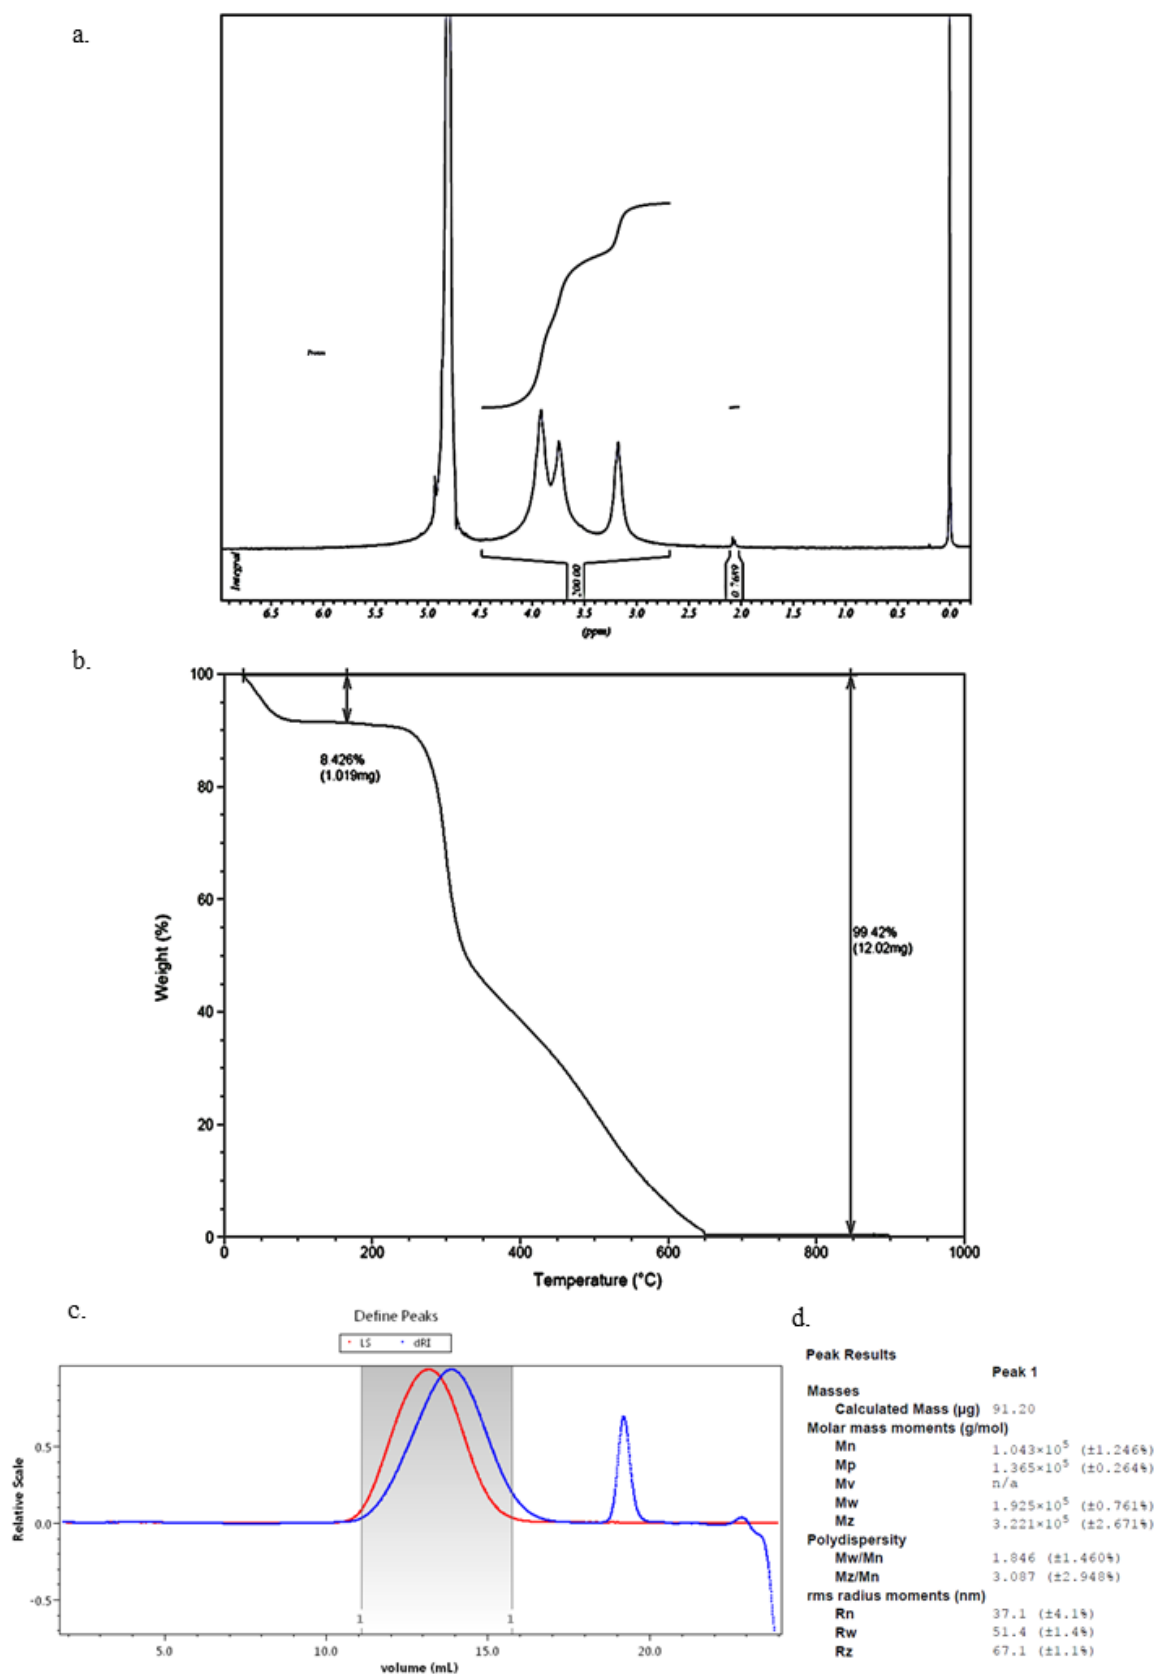

Figure S1. Characterization of starting chitosan (244LG, batch number 20140503, Mahtani Chitosan Pvt. Ltd., Veraval, India) by: (a)  $^1\text{H}$  NMR spectroscopy for the determination of DA, (b) Thermogravimetric analysis for the determination of water and ash contents and (c and d) Size-exclusion chromatography of the determination of average molar masses ( $M_w$  and  $M_n$ ) and dispersity ( $M_w/M_n$ ).

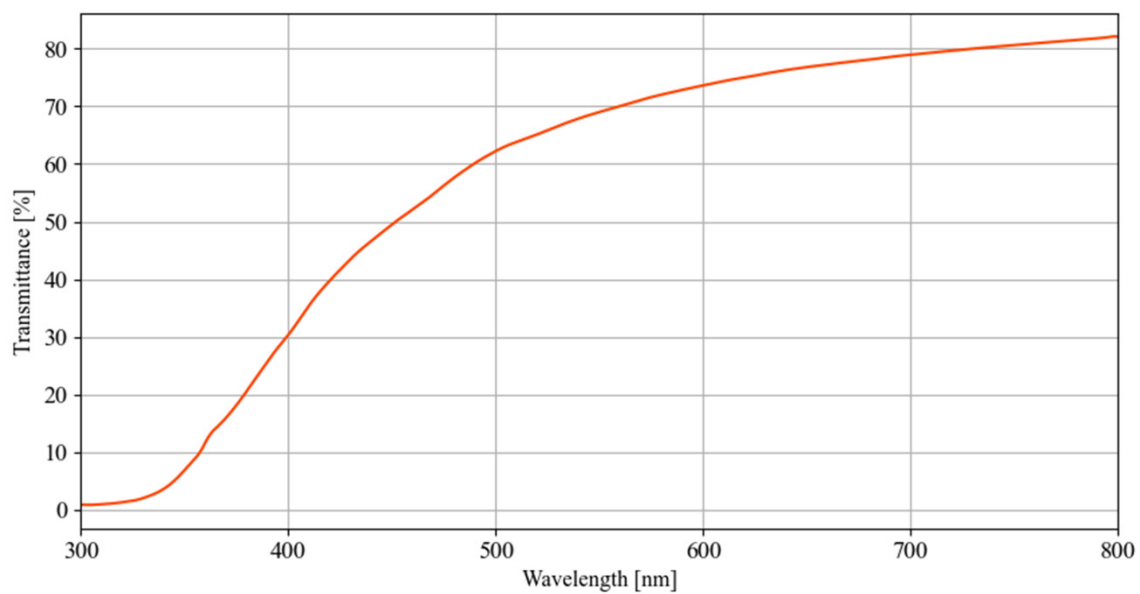

Figure S2. Transmittance spectrum of 0.3 mm thick neutralized chitosan film in the range of 300 to 800 nm.

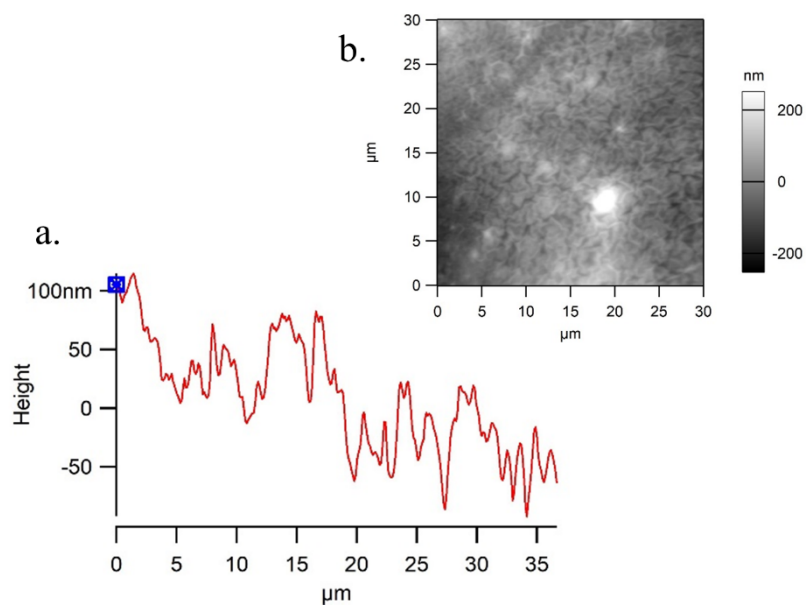

Figure S3. AFM measurements on neutralized chitosan film: Line measurement (a) of the height extracted from the height map (b)

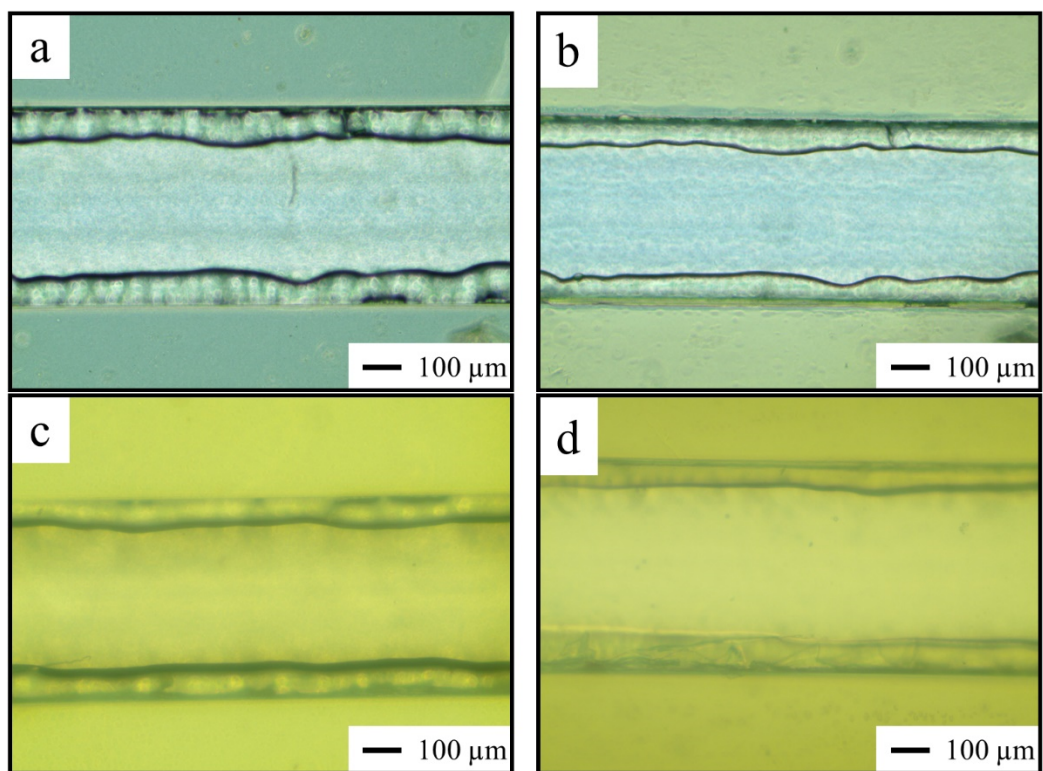

Figure S4: Microscopic images of a chitosan/glass device with a 500  $\mu\text{m}$  wide and 150  $\mu\text{m}$  high channel before the injection (a) and after 24 h of injection of deionized water at 100  $\mu\text{L.h}^{-1}$  (b); Images of an all-chitosan device before (c) and after 24 h of injection (d).
